# Supplementary material
Source: PubMed Central journal article supplement (PMC5752860)
Supplement: AEM.02129-17_zam002188259s1.pdf [file AEM.02129-17_zam002188259s1.pdf]

**Table S1 The predicted value and apparent melting temperature of single point mutants**

| Enzyme Variant | I-Mutant 3.0<br>(kcal.mol <sup>-1</sup> ) | FoldX (kcal.mol <sup>-1</sup> ) | Rosetta<br>(kcal.mol <sup>-1</sup> ) | $T_m^{\text{app}}$ (°C) | $\Delta T_m^{\text{app}}$<br>(°C) |
|----------------|-------------------------------------------|---------------------------------|--------------------------------------|-------------------------|-----------------------------------|
| WT             | /                                         | /                               | /                                    | 58.7±0.7                | 0                                 |
| N186W          | 0.47                                      | -1.23                           | -1.27                                | 55.6±0.7                | -3.1                              |
| N264W          | 0.35                                      | -1.05                           | -1.07                                | 57.2±0.8                | -1.5                              |
| T18W           | 0.51                                      | -1.39                           | -1.2                                 | 57.8±0.6                | -0.9                              |
| D238L          | 0.86                                      | -1.57                           | -2.79                                | 57.8±0.0                | -0.9                              |
| D238R          | 0.4                                       | -1.55                           | -1.24                                | 58.0±0.5                | -0.7                              |
| T18I           | 0.67                                      | -2.08                           | -1.20                                | 58.1±0.4                | -0.6                              |
| D238F          | 0.72                                      | -1.48                           | -1.18                                | 58.2±0.6                | -0.5                              |
| E220I          | 0.45                                      | -2.13                           | -1.17                                | 58.7±0.2                | 0                                 |
| D226L          | 0.33                                      | -0.73                           | -1.43                                | 58.7±0.1                | 0                                 |
| D238P          | 0.15                                      | -1.40                           | -1.82                                | 58.7±0.3                | 0                                 |
| D238W          | 0.63                                      | -0.66                           | -5.78                                | 58.7±0.1                | 0                                 |
| D238Y          | 0.53                                      | -1.43                           | -1.81                                | 58.7±0.4                | 0                                 |
| E220V          | 0.12                                      | -1.85                           | -1.32                                | 58.8±0.4                | 0.1                               |
| S114Y          | 0.38                                      | -1.75                           | -2.66                                | 58.9±0.5                | 0.2                               |
| S114V          | 0.66                                      | -1.06                           | -1.86                                | 59.1±0.3                | 0.4                               |
| S114F          | 0.5                                       | -2.04                           | -2.37                                | 59.2±0.2                | 0.5                               |
| N120L          | 0.48                                      | -0.70                           | -1.26                                | 59.2±0.6                | 0.5                               |
| A8L            | 0.09                                      | -1.05                           | -1.93                                | 59.3±0.5                | 0.6                               |
| N186L          | 0.69                                      | -1.23                           | -1.92                                | 59.3±0.3                | 0.6                               |
| N227L          | 0.08                                      | -1.62                           | -1.45                                | 59.3±0.5                | 0.6                               |
| N120R          | 0.25                                      | -1.38                           | -1.27                                | 59.4±0.8                | 0.7                               |
| S114W          | 0.31                                      | -1.76                           | -3.05                                | 59.5±0.6                | 0.8                               |
| Q233I          | 0.08                                      | -0.73                           | -2.08                                | 59.5±0.2                | 0.8                               |
| E230R          | 0.2                                       | -0.72                           | -1.50                                | 59.9±0.4                | 1.2                               |
| E230M          | 0.6                                       | -3.15                           | -3.27                                | 60.0±0.3                | 1.3                               |
| E230F          | 0.58                                      | -1.41                           | -3.59                                | 60.3±0.2                | 1.6                               |
| E230Y          | 0.28                                      | -0.84                           | -3.49                                | 60.8±0.6                | 2.1                               |
| T22I           | 0.27                                      | -1.46                           | -1.80                                | 61.1±0.9                | 2.4                               |
| E230P          | 0.00                                      | -1.02                           | -3.91                                | 61.2±0.4                | 2.5                               |
| E230W          | 0.42                                      | -1.09                           | -1.42                                | 61.4±0.2                | 2.7                               |
| E230C          | 0.01                                      | -1.05                           | -2.17                                | 62.0±0.3                | 3.3                               |
| E230T          | 0.15                                      | -0.51                           | -3.62                                | 62.5±0.5                | 3.8                               |
| T18K           | 0.14                                      | -1.84                           | -1.06                                | 63.2±0.0                | 4.5                               |
| E230L          | 0.62                                      | -2.44                           | -3.07                                | 64.1±0.2                | 5.4                               |
| E230V          | 0.51                                      | -0.99                           | -3.93                                | 64.1±0.3                | 5.4                               |
| E230I          | 0.60                                      | -2.13                           | -4.72                                | 64.4±0.2                | 5.7                               |

**Table S2 Primers used for construction of mutants**

| Enzyme Variant | Forward Primer (5'-3')                             | Reverse Primer (5'-3')                              |
|----------------|----------------------------------------------------|-----------------------------------------------------|
| N186W          | gcgacctgcctttgcctgtacgtgttagcaccgg                 | ccggctgaacaacgtaccaggcaaggcagggtcgc                 |
| N264W          | tactttggtatctggacagcctct                           | tgtccagataccaagtacgagaga                            |
| T18W           | gagttggcagatagttagtgaataacaattcattgatttctgcgaggtag | ctacctcgaagaatcaatgaattgtgtattactactactactctccaactc |
| D238L          | ctgttcaggctgcacaagcctctgaaacctctgattgctc           | gagcaatcagaggttccaggaggctgtgcagacctgaacag           |
| D238R          | gcaatcagaggtttccagacggctgtgcagacctgaac             | gttcaggctgcacaagccgtctggaacctctgattgc               |
| T18I           | ctcgaagaatcaatgaattgatttattactactactatctgcc        | tggcagatagttagtgaataaataattcattgatttctgcgag         |
| D238F          | tgttcaggctgcacaagcttctgaaacctctgattgc              | gcaatcagaggttccagaagctgtgcagacctgaaca               |
| E220I          | gctattgtcagtaatccaactcaatgccagcgtggagaaaacaaaag    | ctttgttttctccacgctggcattgagattggattactgacaatagc     |
| D226L          | gctggcaggagtagtattggattactctgaatagcccagagactg      | cagtctctggctattcagagtaatccaactctcgcaccg             |
| D238P          | ctgttcaggctgcacaagcccactgaaacctctgattgctc          | gagcaatcagaggttccagtgaggctgtgcagacctgaacag          |
| D238W          | ctgttcaggctgcacaagctggctgaaacctctgattgctc          | gagcaatcagaggttccagcccagctgtgcagacctgaacag          |
| D238Y          | gtctgcacaagctatctggaacctc                          | gaggttccagatagctgtgcagac                            |
| E220V          | gtcagtaatccaactcaacgccagcgtggagaaaacc              | ggttttctccacgctggcgttagtattggattactgac              |
| S114Y          | cgtttgaactccccgtaatagtcaggaaatcccttgtgt            | acacaagggtactctggactattacggggaagtcaaaacg            |
| S114V          | gtacacaagggtactctggacgtgtacggggaagtcaaaacgag       | ctcgtttgaactccccgtacacgtccaggaatcccttgtgtac         |
| S114F          | acacaagggtactctggacttttacggggaagtcaaaac            | gttttgaactccccgtaaaagtcaggaaatcccttgtgt             |
| N120L          | gaacagtagcaacaagctccagttgaactccccgtaactgtccag      | ctggacagttacggggaagtcaactggagctgtgtactgttc          |
| A8L            | ttcttgcgagtagccagacgataaccaccattaatgctcattgct      | agcaatgagcattaatggtgtatccgtctgctacctcgaagaa         |
| N186L          | gcgacctgcctttgcctgtacgtgttagcaccgg                 | ccggctgaacaacgtacaggcaaggcagggtcgc                  |
| N227L          | gaggagtagtattgattactgacctgagcccagagactgtcaggtc     | gacctgaacagctcttggctcaggtcagtaatccaactcctc          |
| N120R          | gaacagtagcaacaagctcacgtgaactccccgtaactgtccag       | ctggacagttacggggaagtcaactgagctgtgtactgttc           |
| S114W          | gactggtacggggaagtcaaaacg                           | tgaactccccgtaccagtccagga                            |
| Q233I          | atcgcttgcgagacaataacagctctgggctattgtcagtaatc       | gattactgacaatagcccagagactgttattgtcgcacaagcgat       |
| E230R          | ttgattactgacaatagcccagctactgttcaggctgcacaag        | cttgtgcagacctgaacagtagctgggctattgtcagtaatcaa        |
| E230M          | tgtgcagacctgaacagctattggctattgtcagtaatcc           | ggattactgacaatagcccagctactgttcaggctgcaca            |
| E230F          | attgattactgacaatagcccattactgttcaggctgcacaagc       | gcttgcagacctgaacagtaaatggctattgtcagtaatccaat        |
| E230Y          | ggattactgacaatagcccataactgttcaggctgcaca            | tgtgcagacctgaacagtatatgggctattgtcagtaatcc           |
| T22I           | tcaatgaattgacttattactacttctatctccaactctactgccg     | cggcagtagcagttgcagatagaatagtgaataagtcaattcattga     |
| E230P          | gattactgacaatagcccagctgttcaggctgcaca               | tgtgcagacctgaacagctcgggtggtattgtcagtaatc            |
| E230W          | gattactgacaatagcccagctgttcaggctgcaca               | tgtgcagacctgaacagctcagctggtggtattgtcagtaatc         |
| E230C          | ttgattactgacaatagcccagctgttcaggctgcacaag           | cttgtgcagacctgaacagtagctgggctattgtcagtaatccaa       |
| E230T          | ttgattactgacaatagcccagctgttcaggctgcacaag           | cttgtgcagacctgaacagtagctgggctattgtcagtaatccaa       |
| T18K           | cctcgaagaatcaatgaattgaatattactactactatctccaac      | gttggcagatagttagtgaatatttcaattcattgatttctgcgag      |
| E230L          | gattactgacaatagcccagctgttcaggctgcaca               | tgtgcagacctgaacagctcagctgggctattgtcagtaatc          |
| E230V          | actgacaatagcccagctgttcaggctgc                      | gcagacctgaacagctcagctgggctattgtcagct                |
| E230I          | tagcccaattactgttcaggctgc                           | agtaattgggctattgtcagtaatc                           |
| S56C           | gcatttgtatcatagatgagcgtacccaagcttgataatctgagat     | atctcaagattatcaagacttgggtacgctcatctatgatacaaatgc    |
| N63C           | gtgcaaccattgcatatgatcatagatgagcgtgctccaa           | ttggagcagctcatctatgatactgtgcaatggtgtcac             |
| V189C          | accctgcctttccaactcagttgtagcaccggcatt               | aatgccggtgctacaaactgagttgcaaaaggcagggt              |
| D238C          | gcaatcagaggtttccagacagctgtgcagacctgaac             | gttcaggctgcacaagctgtctggaacctctgattgc               |

**Table S3 Prediction and stability effect of potential disulfide bonds**

| SS-bond      | Predicted by <sup>a</sup> | FoldX<br>(kcal.mol <sup>-1</sup> ) | Visual<br>inspection | SS-bond        | Predicted by <sup>a</sup> | FoldX<br>(kcal.mol <sup>-1</sup> ) | Visual<br>inspection |
|--------------|---------------------------|------------------------------------|----------------------|----------------|---------------------------|------------------------------------|----------------------|
| 5-236        | 1                         | -0.01                              | Failed               | 72-74          | 2/3                       | 0.51                               | /                    |
| 10-12        | 3                         | 2.14                               | /                    | 73-136         | 3                         | 4.34                               | /                    |
| 10-13        | 1/3/4                     | 2.46                               | /                    | 74-139         | 4                         | -0.90                              | Failed               |
| 20-172       | 1/2/3/4                   | 6.82                               | /                    | 77-140         | 1/3/4                     | 6.22                               | /                    |
| 21-263       | 4                         | 1.21                               | /                    | 95-109         | 1/3/4                     | 0.98                               | /                    |
| 23-78        | 4                         | 5.59                               | /                    | 96-106         | 1/2/3                     | 3.57                               | /                    |
| 25-263       | 4                         | 2.71                               | /                    | 97-109         | 1/2/3/4                   | 1.05                               | /                    |
| 31-35        | 1/4                       | 5.30                               | /                    | 101-102        | 3                         | 3.19                               | /                    |
| 31-39        | 1/2/3                     | 0.43                               | /                    | 102-187        | 4                         | 3.95                               | /                    |
| 33-54        | 3/4                       | 2.54                               | /                    | 115-149        | 2/3/4                     | 5.05                               | /                    |
| 33-63        | 3                         | 2.54                               | /                    | 115-152        | 1/3                       | 8.18                               | /                    |
| 34-56        | 1/4                       | 1.23                               | /                    | 118-122        | 4                         | 5.87                               | /                    |
| 36-51        | 4                         | 2.11                               | /                    | 133-136        | 1/3/4                     | 4.31                               | /                    |
| 36-54        | 4                         | -0.37                              | Failed               | 137-168        | 3                         | 1.78                               | /                    |
| 37-39        | 2/3                       | 1.15                               | /                    | 139-170        | 3/4                       | 0.35                               | /                    |
| 49-69        | 4                         | 3.98                               | /                    | 140-171        | 1/4                       | 4.22                               | /                    |
| 50-68        | 1                         | 2.21                               | /                    | 160-162        | 3                         | -0.69                              | Failed               |
| 52-53        | 3                         | 2.94                               | /                    | 166-192        | 1/2/4                     | 2.93                               | /                    |
| 52-66        | 1/2/3                     | 4.77                               | /                    | 171-195        | 3/4                       | 6.22                               | /                    |
| 54-65        | 1/3/4                     | 2.39                               | /                    | 182-216        | 3/4                       | 4.03                               | /                    |
| <b>56-63</b> | <b>4</b>                  | <b>-1.00</b>                       | <b>Passed</b>        | 189-218        | 4                         | 0.96                               | /                    |
| 57-117       | 1/2/3                     | 0.34                               | /                    | <b>189-238</b> | <b>1/3/4</b>              | <b>-2.42</b>                       | <b>Passed</b>        |
| 57-118       | 4                         | 2.12                               | /                    | 210-212        | 3                         | 2.80                               | /                    |
| 60-114       | 4                         | 1.12                               | /                    | 223-233        | 3                         | 4.04                               | /                    |
| 60-117       | 1/4                       | 0.92                               | /                    | 226-231        | 1/2/4                     | -0.73                              | Failed               |
| 65-78        | 4                         | 5.89                               | /                    | 241-243        | 3                         | 2.59                               | /                    |
| 69-72        | 4                         | 0.93                               | /                    | 264-269        | 1/4                       | -0.39                              | Failed               |
| 69-74        | 1                         | 1.16                               | /                    | 267-269        | 3                         | 0.02                               | /                    |

<sup>a</sup> 1, SSBOND; 2, DbD2; 3, MODIP; 4, BridgeD.

**Table S4 Quantifying disulfide bonds**

| RML variant          | Free thiol/protein<br>(mol/mol) |                  | Total<br>number of<br>free<br>cysteines | Deduced<br>number of<br>SS-bonds |
|----------------------|---------------------------------|------------------|-----------------------------------------|----------------------------------|
|                      | -DTT                            | +DTT             |                                         |                                  |
| T18K/T22I/E230I      | $0.91 \pm 0.08$                 | $6.68 \pm 0.21$  | 1                                       | 3                                |
| S56C/N63C            | $0.93 \pm 0.10$                 | $8.74 \pm 0.35$  | 1                                       | 4                                |
| V189C/D238C          | $0.92 \pm 0.06$                 | $8.87 \pm 0.58$  | 1                                       | 4                                |
| S56C/N63C/V89C/D238C | $0.95 \pm 0.12$                 | $10.22 \pm 0.49$ | 1                                       | 5                                |

**Table S5 Details of various non-bonded interactions of wild-type residues followed by mutant residues****Wild: Thr18**Hydrogen bonding interaction

| Donor |        |        |      | Acceptor |        |        |      | Type | Distance_DA | Distance_HA | DHA_Angle | HAAA_Angle | DAAA_Angle |
|-------|--------|--------|------|----------|--------|--------|------|------|-------------|-------------|-----------|------------|------------|
| Chain | Res.No | Res.ID | Atom | Chain    | Res.No | Res.ID | Atom |      |             |             |           |            |            |
| A     | 18     | THR    | N    | A        | 14     | ILE    | O    | MM   | 2.99        | 2.13        | 143.5     | 146.1      | 155.3      |
| A     | 18     | THR    | OG1  | A        | 14     | ILE    | O    | SM   | 2.83        | 1.85        | 164.6     | 135.5      | 138.4      |
| A     | 22     | THR    | N    | A        | 18     | THR    | O    | MM   | 2.93        | 2           | 152.5     | 147.7      | 152.9      |
| A     | 22     | THR    | OG1  | A        | 18     | THR    | O    | SM   | 2.87        | 1.87        | 179.2     | 145.3      | 145.4      |

**Mut: Lys18**Hydrogen bonding interaction

| Donor |        |        |      | Acceptor |        |        |      | Type | Distance_DA | Distance_HA | DHA_Angle | HAAA_Angle | DAAA_Angle |
|-------|--------|--------|------|----------|--------|--------|------|------|-------------|-------------|-----------|------------|------------|
| Chain | Res.No | Res.ID | Atom | Chain    | Res.No | Res.ID | Atom |      |             |             |           |            |            |
| A     | 18     | LYS    | N    | A        | 14     | ILE    | O    | MM   | 2.88        | 1.99        | 146.3     | 144.7      | 154.4      |
| A     | 22     | ILE    | N    | A        | 18     | LYS    | O    | MM   | 2.92        | 2.06        | 142.8     | 140.5      | 150.6      |

Cation-pi interactions

| Cationic residue |        |        | Aromatic residue |        |        | ASA    |          | SS     |          |
|------------------|--------|--------|------------------|--------|--------|--------|----------|--------|----------|
| Chain            | Res.No | Res.ID | Chain            | Res.No | Res.ID | Cation | Aromatic | Cation | Aromatic |
| A                | 18     | LYS    | A                | 261    | PHE    | 39.9   | 5.1      | H      | T        |

**Wild: Thr22**Hydrogen bonding interaction

| Donor |        |        |      | Acceptor |        |        |      | Type | Distance_DA | Distance_HA | DHA_Angle | HAAA_Angle | DAAA_Angle |
|-------|--------|--------|------|----------|--------|--------|------|------|-------------|-------------|-----------|------------|------------|
| Chain | Res.No | Res.ID | Atom | Chain    | Res.No | Res.ID | Atom |      |             |             |           |            |            |
| A     | 22     | THR    | N    | A        | 18     | THR    | O    | MM   | 2.93        | 2           | 152.5     | 147.7      | 152.9      |

|   |    |     |     |   |    |     |   |    |      |      |       |       |       |
|---|----|-----|-----|---|----|-----|---|----|------|------|-------|-------|-------|
| A | 22 | THR | OG1 | A | 18 | THR | O | SM | 2.87 | 1.87 | 179.2 | 145.3 | 145.4 |
| A | 26 | ASN | N   | A | 22 | THR | O | MM | 2.76 | 1.79 | 162.3 | 149.6 | 154.6 |

**Mut: Ile22**

Hydrogen bonding interaction

| Donor |        |        |      | Acceptor |        |        |      | Type | Distance_DA | Distance_HA | DHA_Angle | HAAA_Angle | DAAA_Angle |
|-------|--------|--------|------|----------|--------|--------|------|------|-------------|-------------|-----------|------------|------------|
| Chain | Res.No | Res.ID | Atom | Chain    | Res.No | Res.ID | Atom |      |             |             |           |            |            |
| A     | 22     | ILE    | N    | A        | 18     | LYS    | O    | MM   | 2.92        | 2.06        | 142.8     | 140.5      | 150.6      |
| A     | 22     | ILE    | N    | A        | 19     | TYR    | O    | MM   | 3.07        | 2.45        | 119.7     | 96.1       | 111        |
| A     | 26     | ASN    | N    | A        | 22     | ILE    | O    | MM   | 2.86        | 1.9         | 158.5     | 147.3      | 153.8      |

Hydrophobic interactions

| Residue 1 |        |        | Residue 2 |        |        | SS   |      | ASA  |      |
|-----------|--------|--------|-----------|--------|--------|------|------|------|------|
| Chain     | Res.No | Res.ID | Chain     | Res.No | Res.ID | Res1 | Res2 | Res1 | Res2 |
| A         | 22     | ILE    | A         | 45     | ALA    | H    | T    | 11.3 | 40.2 |
| A         | 22     | ILE    | A         | 263    | ILE    | H    | E    | 11.3 | 11.2 |

**Wild: Glu230**

Hydrogen bonding interaction

| Donor |        |        |      | Acceptor |        |        |      | Type | Distance_DA | Distance_HA | DHA_Angle | HAAA_Angle | DAAA_Angle |
|-------|--------|--------|------|----------|--------|--------|------|------|-------------|-------------|-----------|------------|------------|
| Chain | Res.No | Res.ID | Atom | Chain    | Res.No | Res.ID | Atom |      |             |             |           |            |            |
| A     | 227    | ASN    | ND2  | A        | 230    | GLU    | OE2  | SS   | 2.41        | 1.46        | 155.7     | 162.7      | 171.5      |

**Mut: Ile230**

Hydrophobic interactions

| Residue 1 |        |        | Residue 2 |        |        | SS   |      | ASA  |      |
|-----------|--------|--------|-----------|--------|--------|------|------|------|------|
| Chain     | Res.No | Res.ID | Chain     | Res.No | Res.ID | Res1 | Res2 | Res1 | Res2 |
| A         | 14     | ILE    | A         | 230    | ILE    | H    | E    | 14.2 | 36.2 |

|   |     |     |   |     |     |   |   |      |      |
|---|-----|-----|---|-----|-----|---|---|------|------|
| A | 224 | ILE | A | 230 | ILE | E | E | 0    | 36.2 |
| A | 230 | ILE | A | 232 | VAL | E | E | 36.2 | 2    |
| A | 230 | ILE | A | 261 | PHE | E | T | 36.2 | 5.1  |

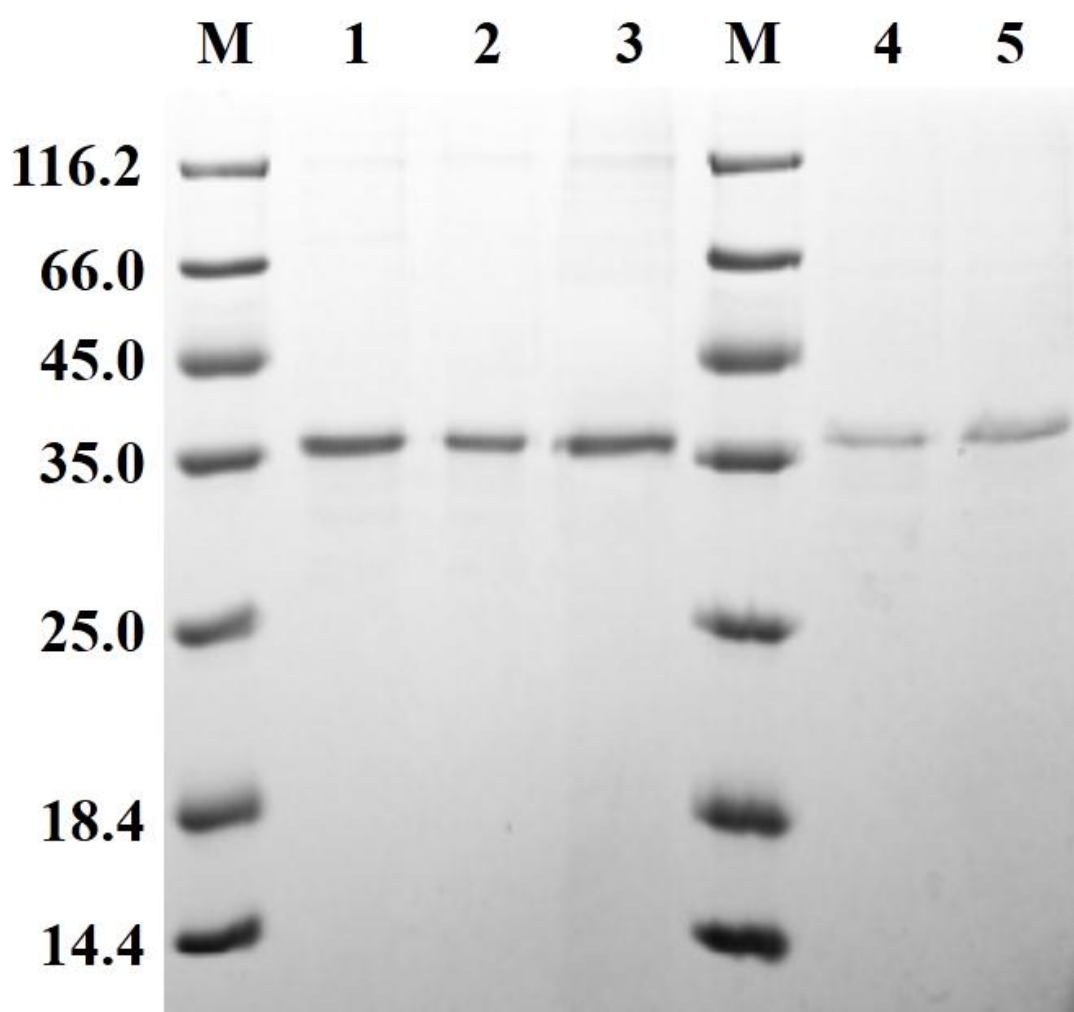

**Fig. S1** SDS-PAGE of T18K/T22I/E230I and disulfide bond mutants (M: Marker, 1: wild-type RML; 2: T18K/T22I/E230I; 3: T18K/T22I/E230I/S56C/N63C; 4: T18K/T22I/E230I/V189C/D238C, 5: M7.)



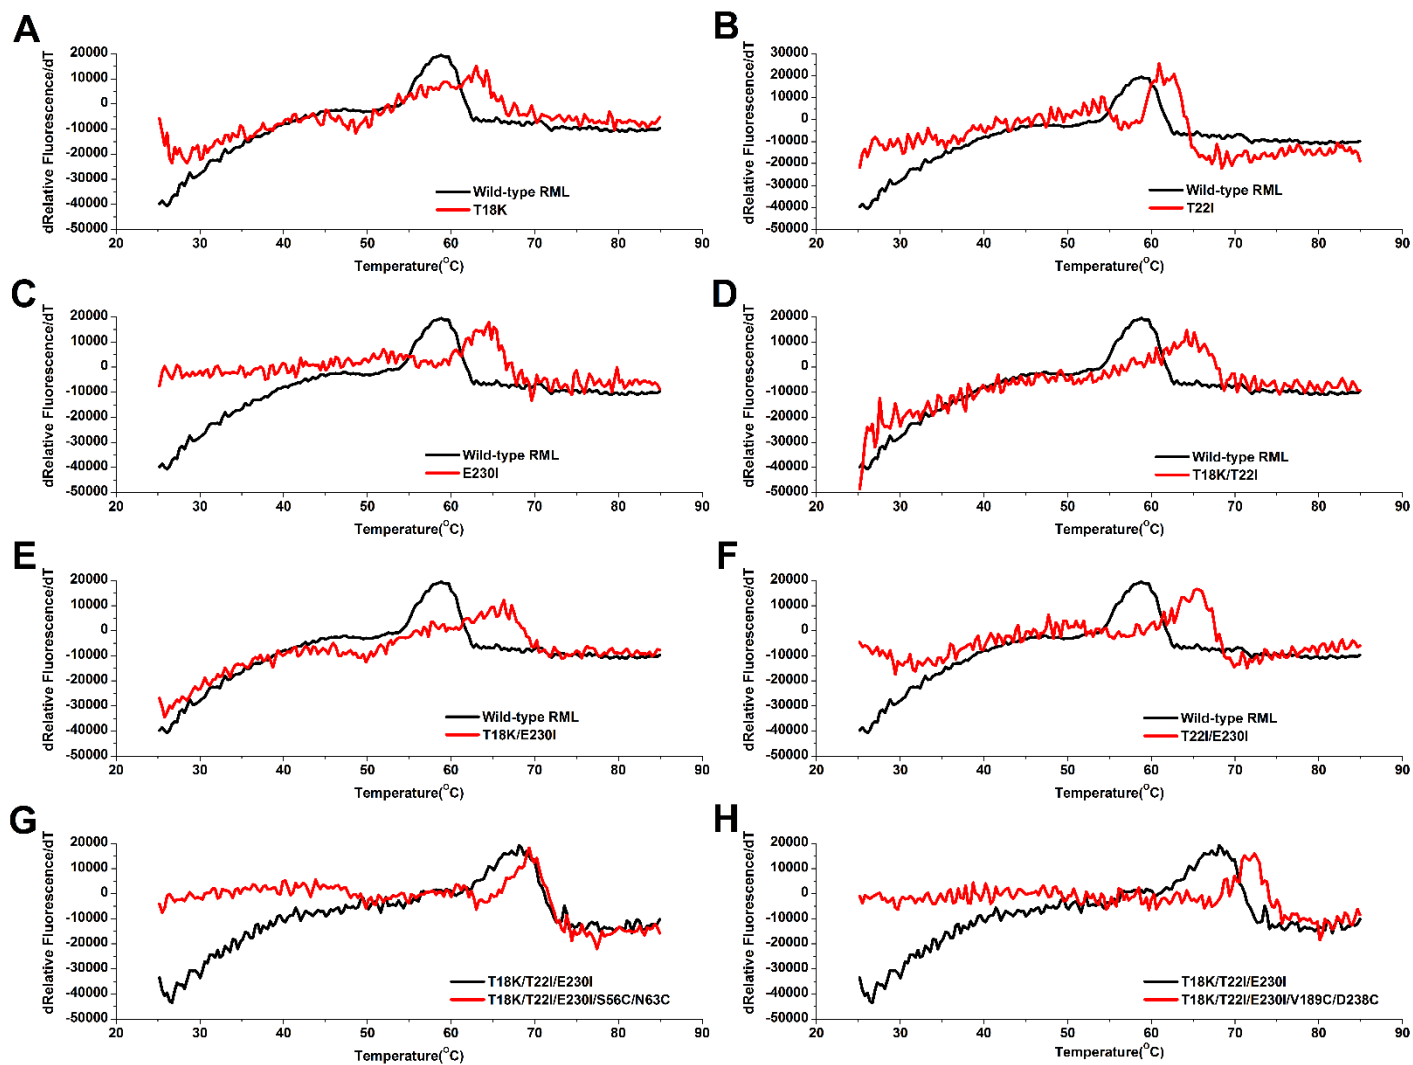

**Fig. S2** The apparent melting temperatures of WT and variants measured by thermofluor method. (A: Wild-type RML and T18K mutant; B: Wild-type RML and T22I mutant; C: Wild-type RML and E230I mutant; D: Wild-type RML and T18K/T22I mutant; E: Wild-type RML and T18K/E230I mutant; F: Wild-type RML and T22I/E230I mutant; G: T18K/T22I/E230I mutant and T18K/T22I/E230I/S56C/N63C mutant; H: T18K/T22I/E230I mutant and T18K/T22I/E230I/V189C/D238C mutant.)
